# Supplementary material for: Mutant p53 drives clonal hematopoiesis through modulating epigenetic pathway
Source: PubMed Central journal article supplement (PMC6906427; doi:10.1038/s41467-019-13542-2), 2019-12-11
Supplement: 41467_2019_13542_MOESM2_ESM.pdf [file 41467_2019_13542_MOESM2_ESM.pdf]

## **Supplementary Information**

### **Mutant p53 Drives Clonal Hematopoiesis through Modulating Epigenetic Pathway**

Chen et al.

## Supplementary Figure 1

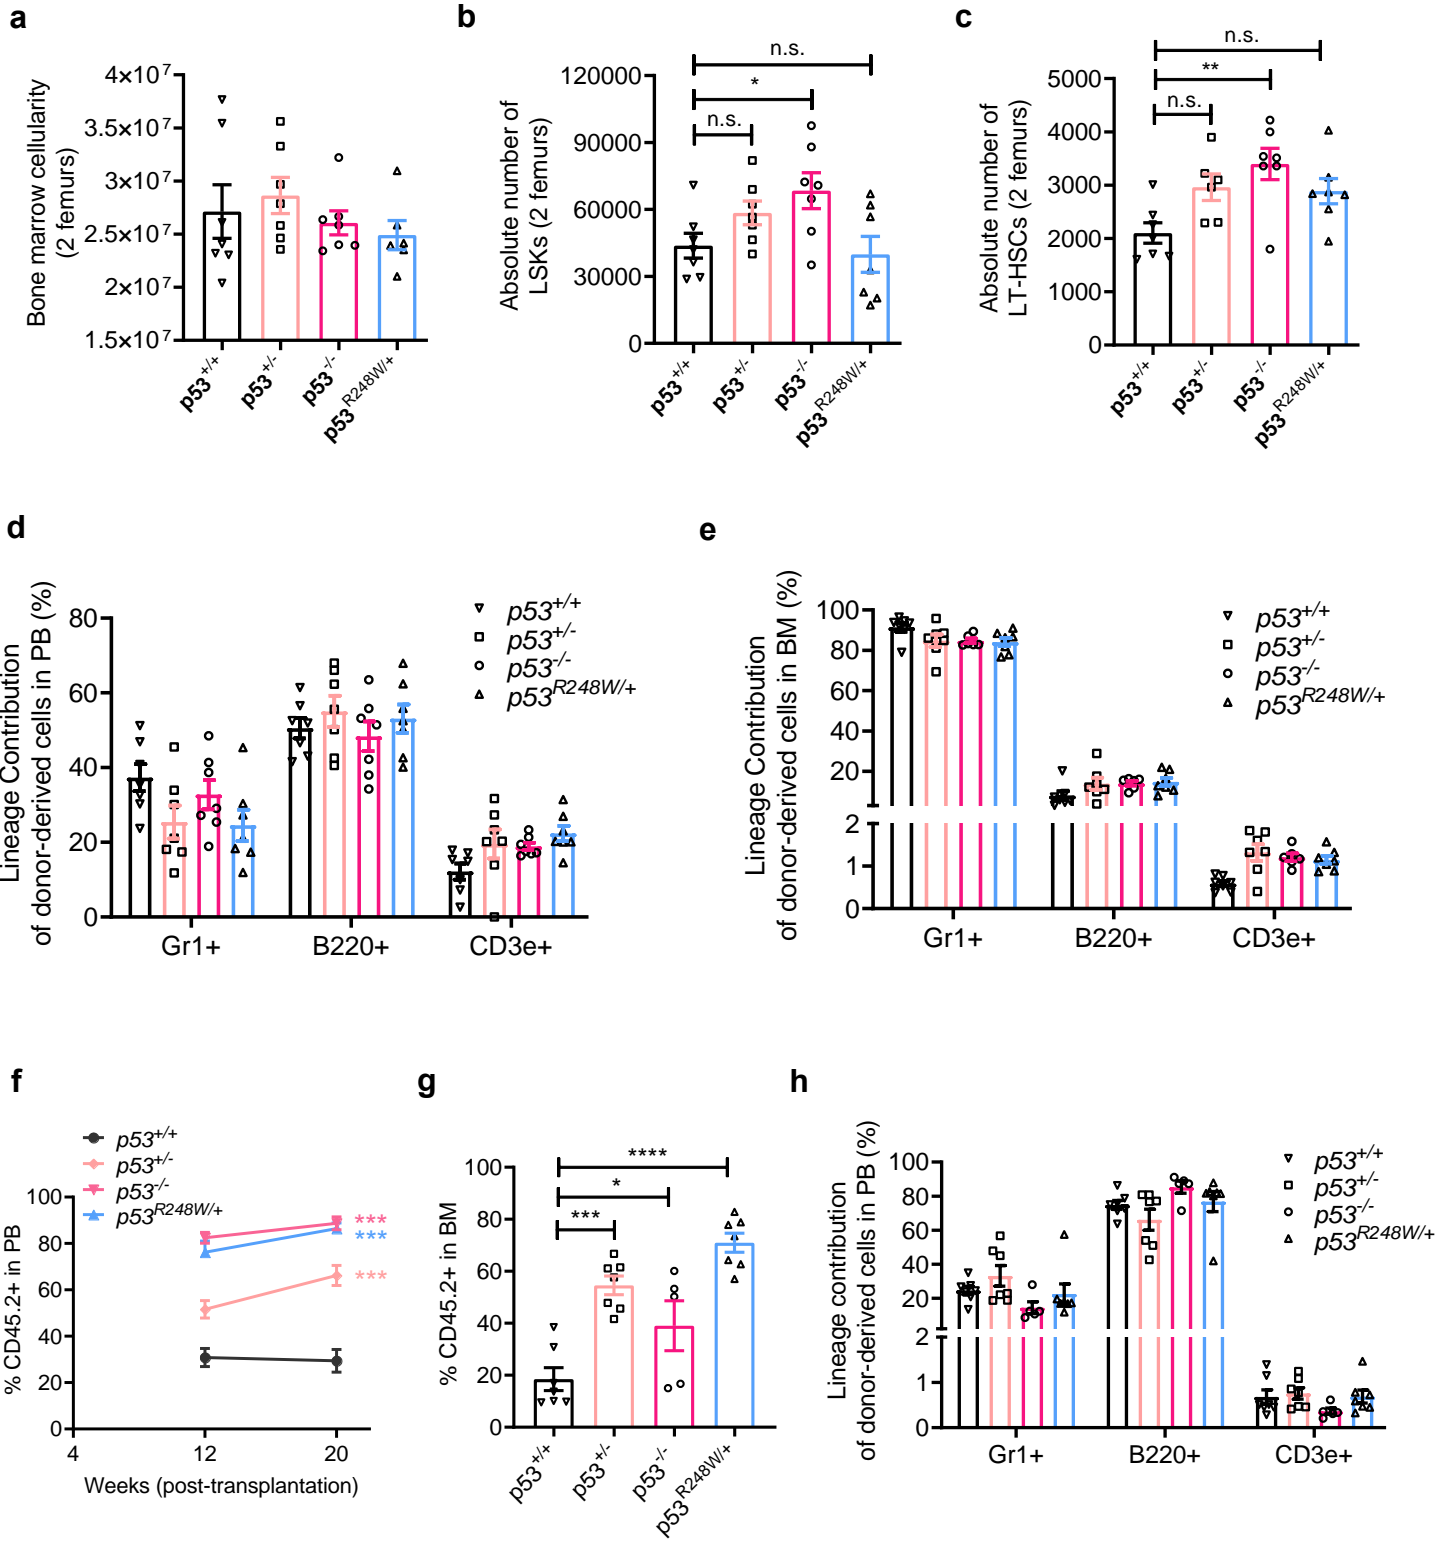

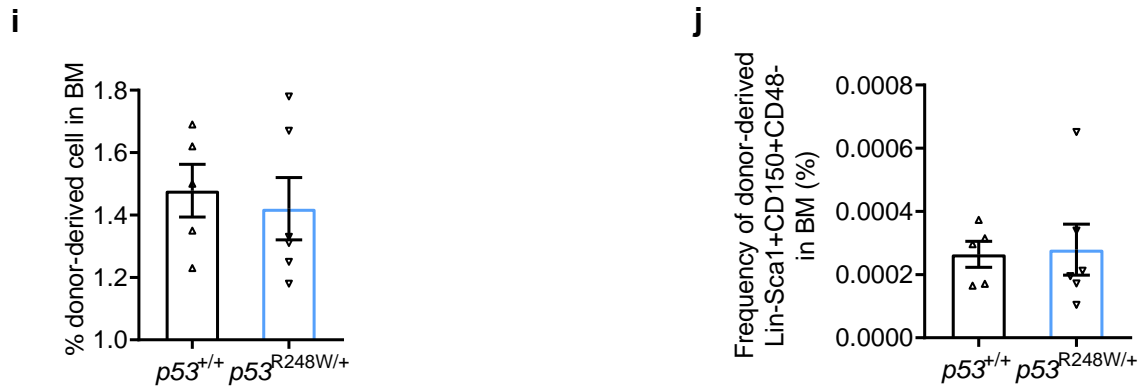

**Supplementary Figure 1.  $p53^{R248W/+}$  HSPCs show enhanced repopulating potential.**

(a) Bone marrow (BM) cell numbers from  $p53^{+/+}$ ,  $p53^{+/-}$ ,  $p53^{-/-}$ , and  $p53^{R248W/+}$  mice (8 to 12 weeks old). n=6-7 mice per group. (b) The absolute number of LSKs in two femurs of  $p53^{+/+}$ ,  $p53^{+/-}$ ,  $p53^{-/-}$ , and  $p53^{R248W/+}$  mice. n=6-7 mice per group. (c) The absolute number of LT-HSCs (CD48<sup>-</sup>CD150<sup>+</sup>LSKs) in two femurs of  $p53^{+/+}$ ,  $p53^{+/-}$ ,  $p53^{-/-}$ , and  $p53^{R248W/+}$  mice. n=6-7 mice per group. (d) Lineage contribution of donor-derived cells in the peripheral blood (PB) of the primary recipient mice at 20 weeks following HSC transplantation was determined by flow cytometry analysis. n =7 mice per group. (e) Lineage contribution of donor-derived cells in the BM of the primary recipient mice at 20 weeks following HSC transplantation was determined by flow cytometry analysis. n =7 mice per group. (f) Percentage of donor-derived cells in the PB of recipient mice following secondary transplantation. n=7 mice per group. (g) Percentage of donor-derived cells in the BM of recipient mice at 20-week after secondary transplantation. n=7 mice per group. (h) Lineage contribution of donor-derived cells in the PB of recipient mice at 20 weeks following secondary transplantation was determined by flow cytometry analysis. n =7 mice per group. (i)  $1 \times 10^7$  BM cells (CD45.2<sup>+</sup>) from  $p53^{+/+}$  and  $p53^{R248W/+}$  mice were transplanted into lethally irradiated recipient mice (CD45.1<sup>+</sup>). At 18 hours after transplantation, the percentage of donor-derived cells in the BM of recipient mice was determined by flow cytometry. n=5-6 mice per group. (j) The frequency of donor-derived Lin<sup>-</sup>Sca1<sup>+</sup>CD48<sup>-</sup>CD150<sup>+</sup> cells in the BM of recipient mice 18 hours after transplantation was determined by flow cytometry. n=5-6 mice per group. Data are represented as mean  $\pm$  SEM. p-values were calculated using one-way ANOVA with Dunnett's multiple comparisons test in **a**, **b**, **c**, and **g**, two-way ANOVA with Dunnett's multiple comparison test in **d**, **e**, **f** and **h**, unpaired t-test with Welch's correction in **i** and **j**; \* $P < 0.05$ , \*\* $P < 0.01$ , \*\*\* $P < 0.001$ , \*\*\*\* $P < 0.0001$ . Source data are provided as a Source Data file.

## Supplementary Figure 2

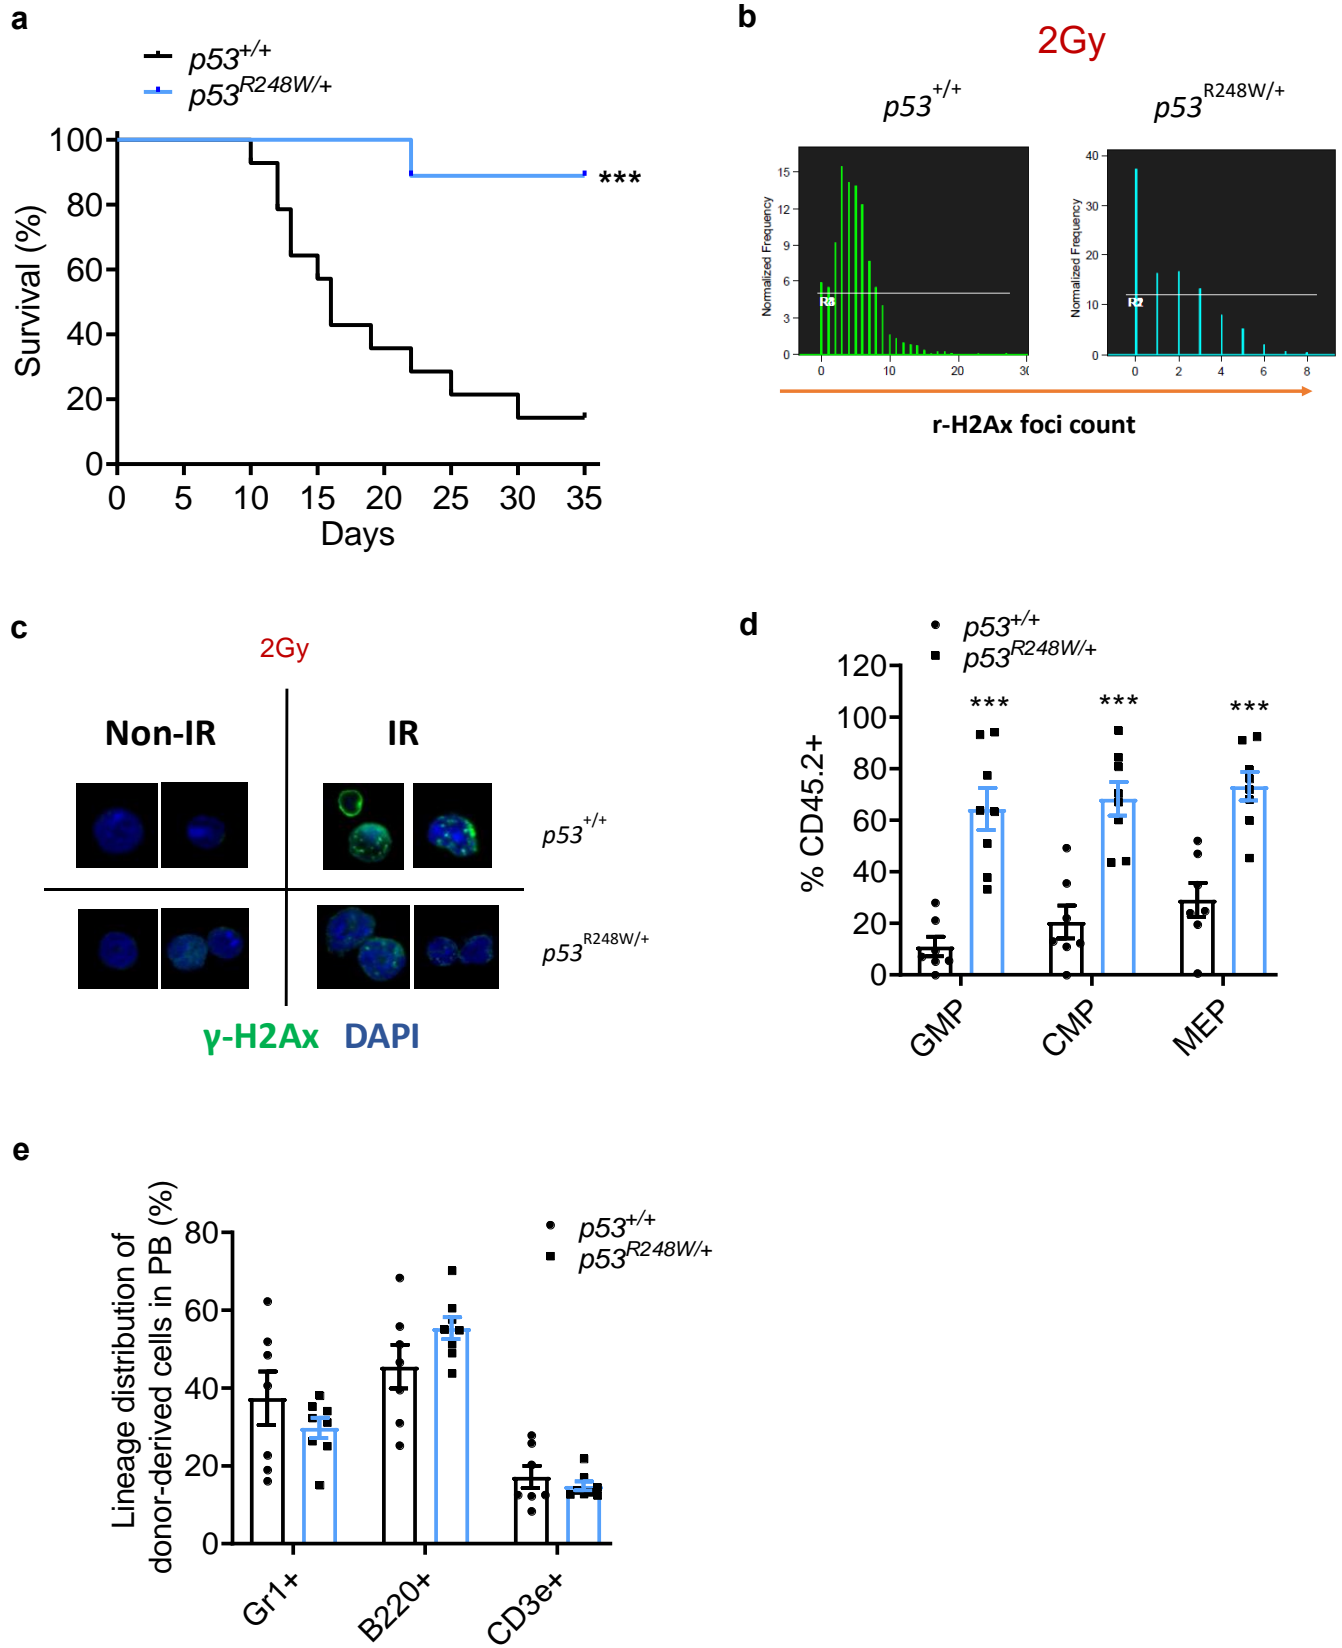

**Supplementary Figure 2.  $p53^{R248W/+}$  HSPCs are not sensitive to irradiation.**

(a) Kaplan-Meier survival curve of  $p53^{+/+}$  and  $p53^{R248W/+}$  mice after 9Gy total body irradiation (TBI).  $p53^{+/+}$  n = 14 mice, and  $p53^{R248W/+}$  n = 9 mice. (b) Fluorescence intensity of  $\gamma$ -H2AX in LT-HSCs at 2 hours after 2Gy irradiation was determined by ImageStream flow cytometry analysis. (c)  $\gamma$ -H2AX foci generation in HSCs following irradiation. LT-HSCs from  $p53^{+/+}$  and  $p53^{R248W/+}$  mice were immunostained for  $\gamma$ -H2AX at 2 hours after 2Gy irradiation. LT-HSCs were stained with DAPI to identify the nuclei. (d) The frequency of donor-derived MEPs, CMPs, and GMPs in the BM of primary recipient mice 16 weeks following transplantation was determined by flow cytometry analysis. n = 7-8 mice per group. (e) Lineage contribution of donor-derived cells in the PB of the primary recipient mice 16 weeks following transplantation was determined by flow cytometry analysis. n = 7-8 mice per group. Data are represented as mean  $\pm$  SEM. p-values were calculated using log-rank (Mantel–Cox) test in **a**, unpaired t-test with Welch's correction in **d**, two-way ANOVA with Dunnett's multiple comparison test in **e**; \*\*\* $P < 0.001$ . Source data are provided as a Source Data file.

# Supplementary Figure 3

a

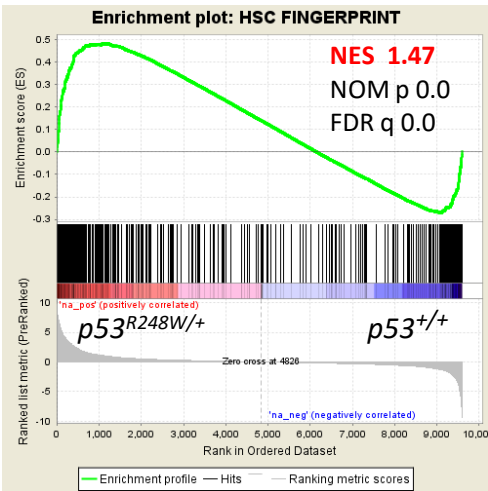

b

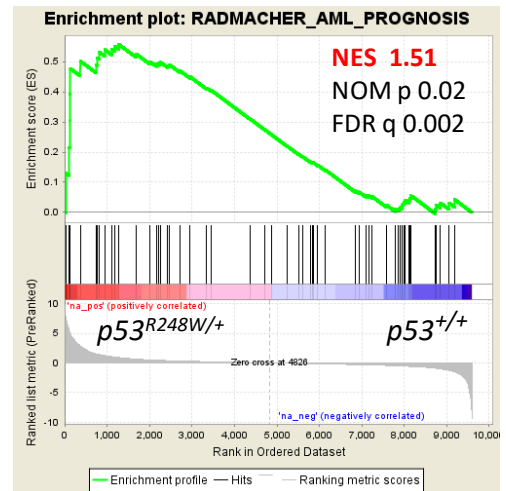

c

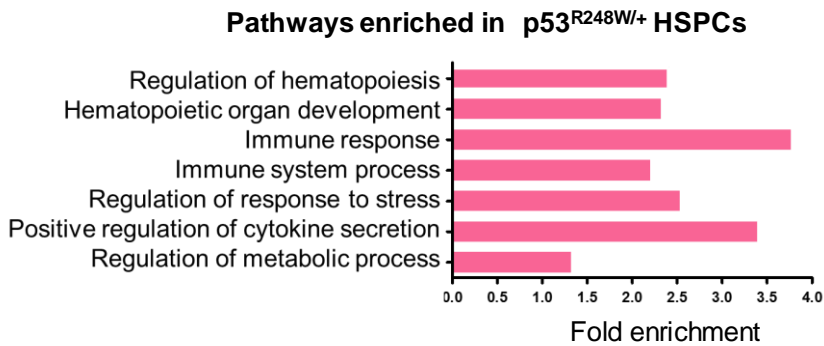

d

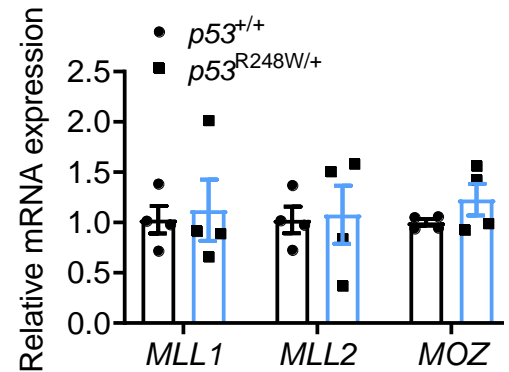

e

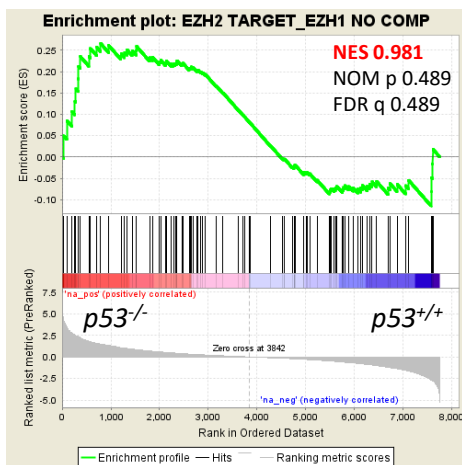

**Supplementary Figure 3.  $p53^{R248W/+}$  HSPCs show enriched HSC signatures.**

(a) Gene Set Enrichment Analysis (GSEA) identified hematopoietic stem cell (HSC) related gene sets are enriched in p53 mutant HSPCs compared to wild-type HSPCs in Molecular Signature Database (MsigDB). (b) GSEA analysis show enrichment of AML signatures in p53 mutant HSPCs compared to wild-type HSPCs. (c) DAVID pathway analysis of genes upregulated in p53 mutant HSPCs compared to wild-type HSPCs. (d) Quantitative RT-PCR analysis of the mRNA levels of *MLL1*, *MLL2*, and *MOZ* in HSCs. n=4 biological replicates. (e) GSEA analysis of EZH2 target genes in  $p53^{+/+}$  and  $p53^{-/-}$  LSKs. Data are represented as mean  $\pm$  SEM. p-values were calculated using GSEA software in a, b, and e, GO analysis in c, unpaired t-test with Welch's correction in d. Source data are provided as a Source Data file.

## Supplementary Figure 4

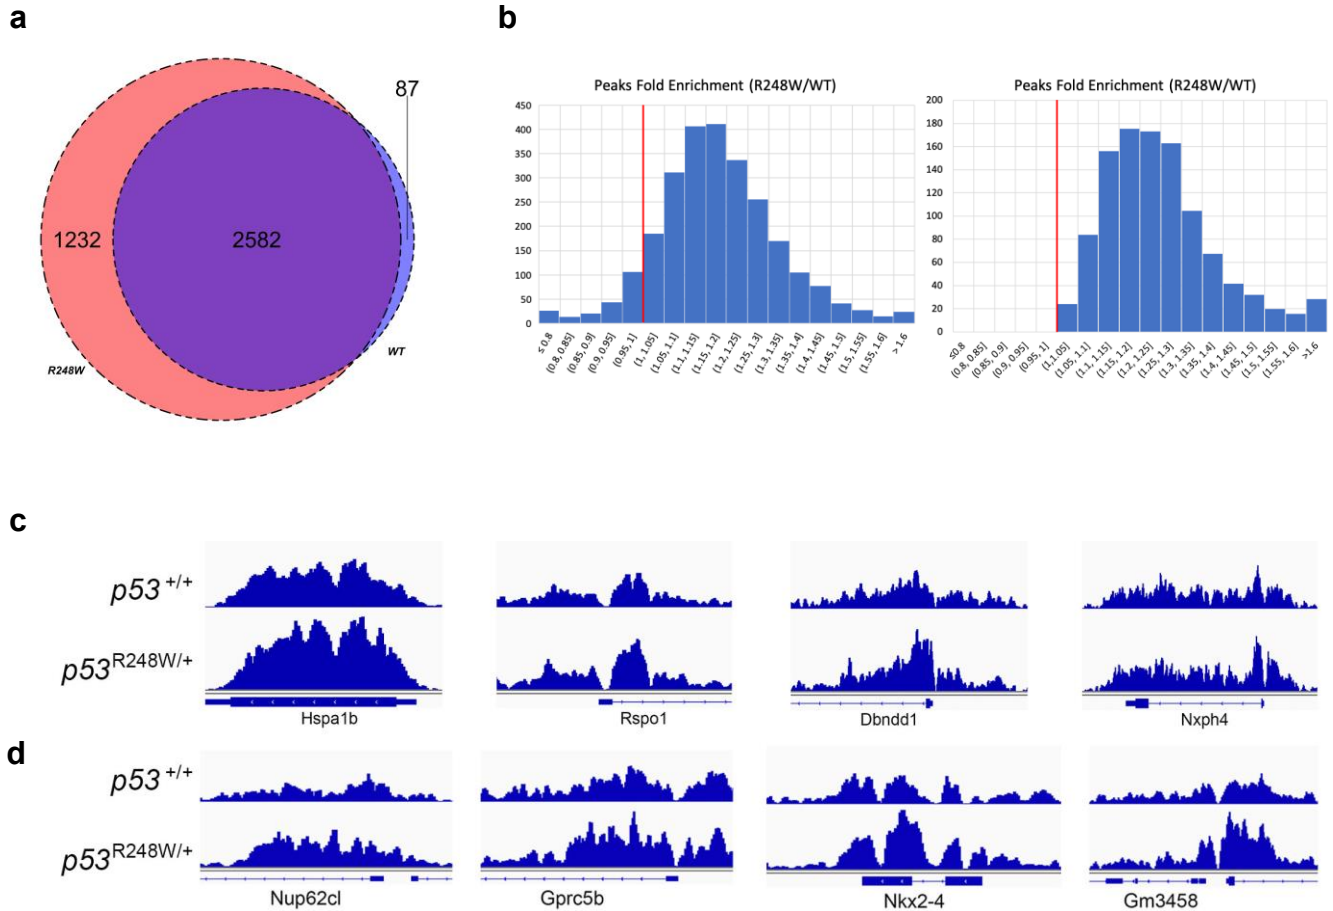

**Supplementary Figure 4.  $p53^{R248W/+}$  enhances genome wide H3K27me3 in HSPCs.** (a) Venn diagram of H3K27me3 ChIP-seq peaks in  $p53^{R248W/+}$  HSPCs compared to  $p53^{+/+}$  HSPCs. (b) Histogram showing the distribution of relative enrichment (peaks fold enrichment) of H3K27me3 peaks in  $p53^{R248W/+}$  HSPCs compared to that of the  $p53^{+/+}$  HSPCs. On the left are peaks shared by both cell types and on the right are those peaks detected in mutant cells but fell below the threshold in WT cells. Note that the majority of peaks have a relative enrichment  $>1$  (as indicated by the red line). (c), (d) Genome browser views of H3K27me3 intensities on selected loci that are from two group of cells as shown in b. Source data are provided as a Source Data file.



## Supplementary Figure 5

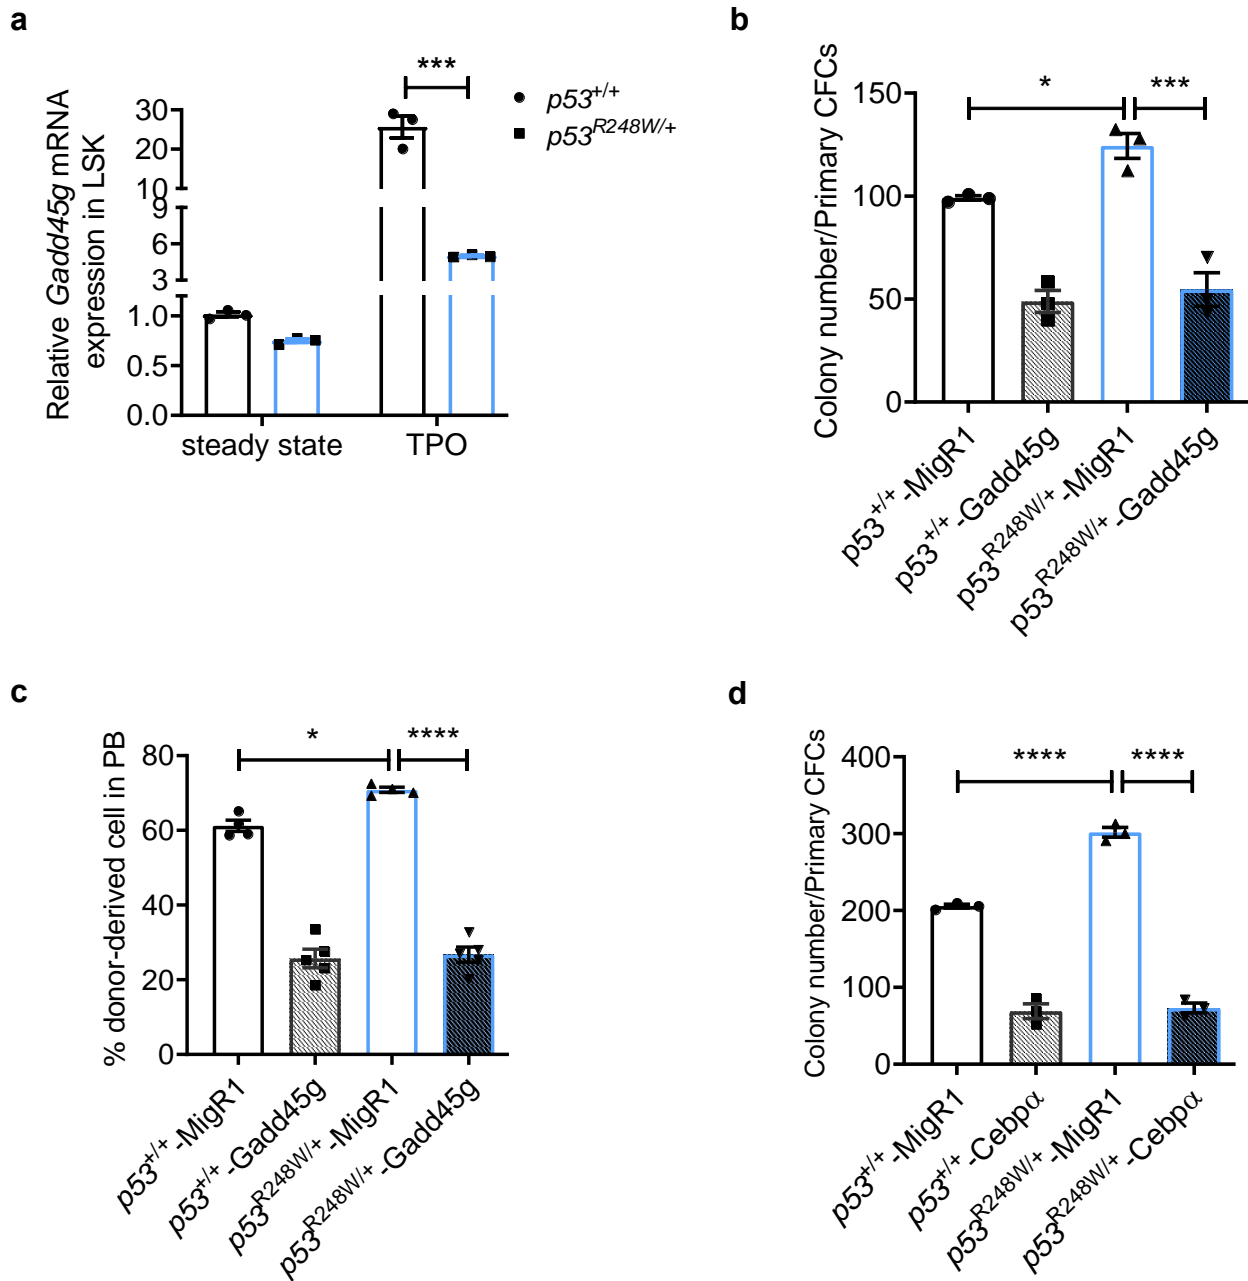

**Supplementary Figure 5. Overexpression of *Gadd45g* decreases the repopulating potential of p53 mutant HSPCs.** (a) Quantitative RT-PCR analysis of mRNA levels of *Gadd45g* in HSPCs with or without TPO stimulation.  $n=3$  biological replicates. (b) Ectopic *Gadd45g* expression decreases the colony formation of p53 mutant BM cells.  $n = 3$  independent experiments performed in duplicate. (c) Ectopic *Gadd45g* expression decreases repopulating potential of p53 mutant BM cells at 8 weeks following competitive transplantation.  $n = 4-5$  mice per group. (d) Ectopic *Cebpa* expression decreases the colony formation of p53 mutant BM cells.  $n = 3$  independent experiments performed in triplicate. Data are represented as mean  $\pm$  SEM.  $p$ -values were calculated using two-way ANOVA with Bonferroni's multiple comparisons test in **a**, and one-way ANOVA with

Turkey's multiple comparison test in **b**, **c** and **d**; \* $P < 0.05$ , \*\*\* $P < 0.001$ , \*\*\*\* $P < 0.0001$ .  
Source data are provided as a Source Data file.

## Supplementary Figure 6

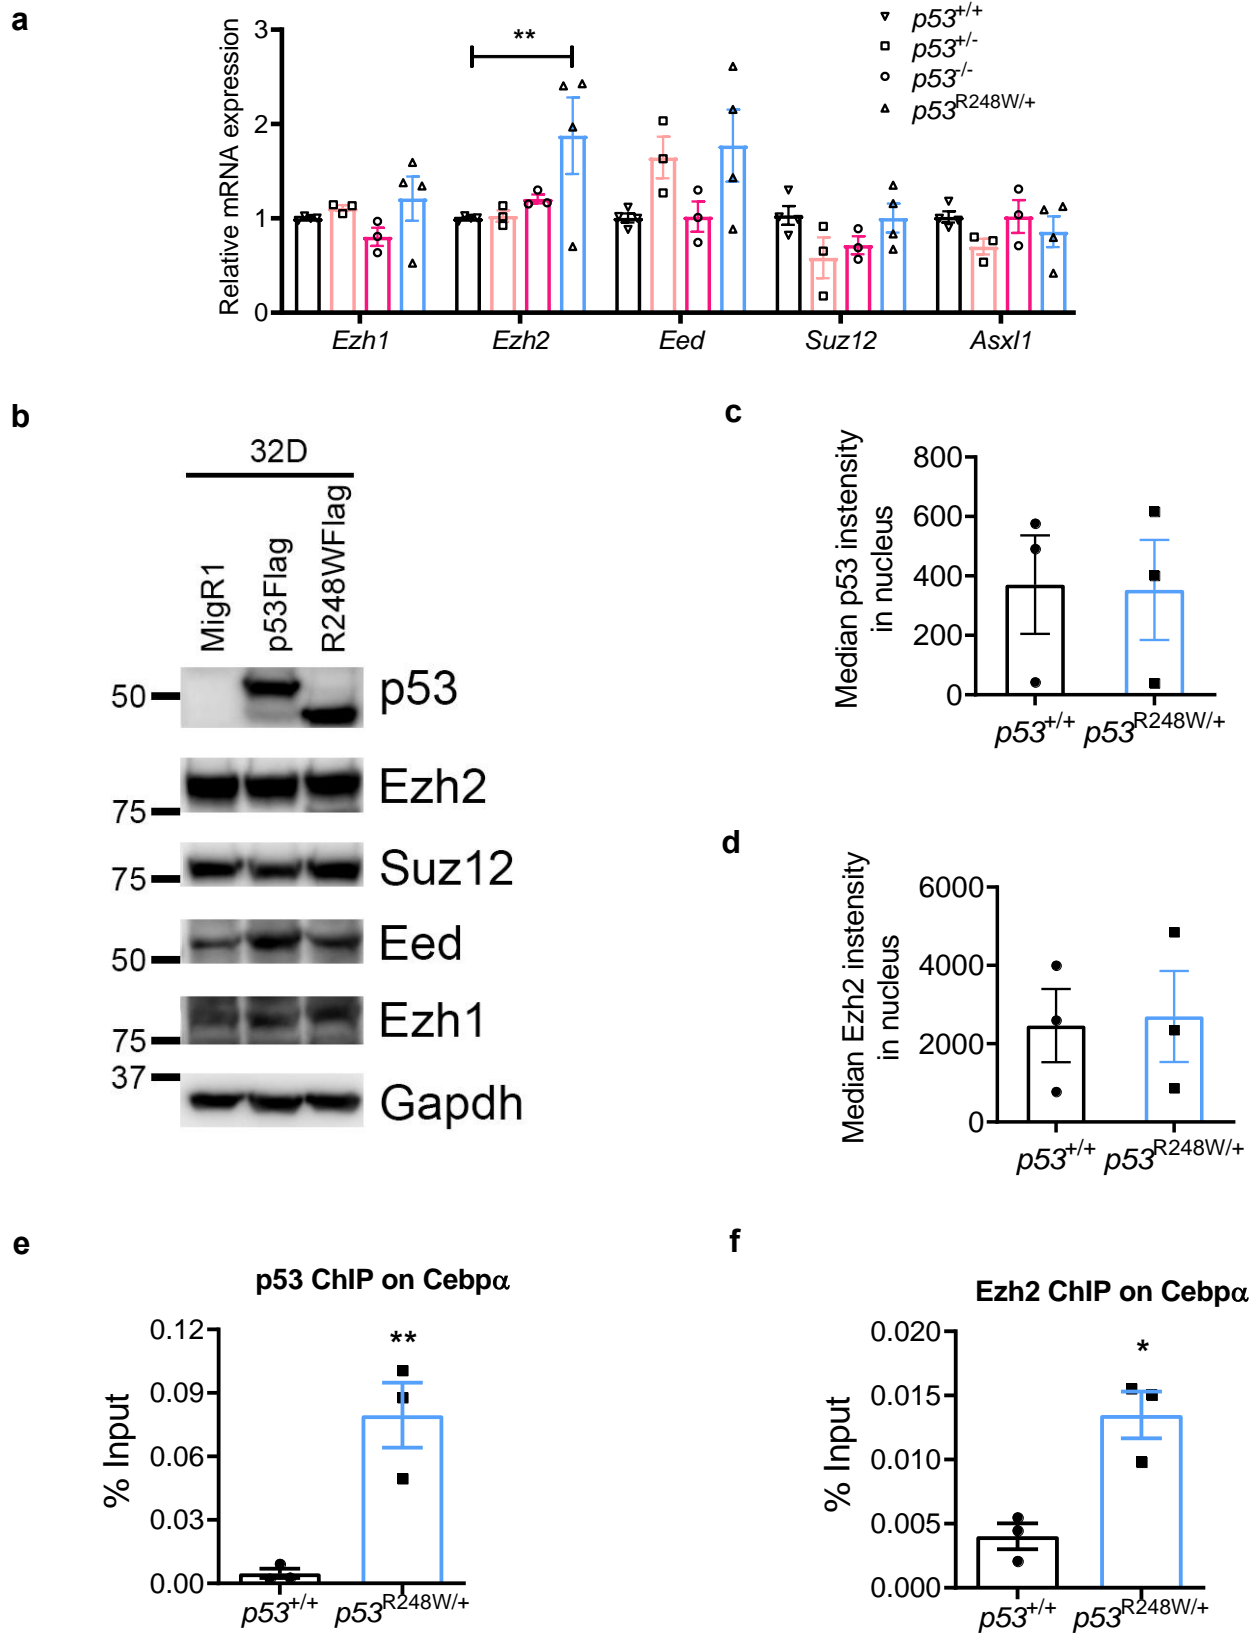

**Supplementary Figure 6. Mutant p53 interacts with EZH2 in HSPCs.** (a) The expression of the components of the PRC2 complex, including *Ezh1*, *Ezh2*, *Eed*, and *Suz12*, in HSPCs was determined by quantitative RT-PCR analysis. n=3-4 biological replicates. (b) Ectopic expression of wild-type (WT) or mutant p53 did not affect the protein levels of the PRC2 components in 32D cells. (c) Median fluorescent intensity (MFI) of p53 in the nucleus of *p53*<sup>+/+</sup> and *p53*<sup>R248W/+</sup> HSPCs (CD150<sup>+</sup>LSKs). n=3 biological replicates. (d) MFI of *Ezh2* in the nucleus of *p53*<sup>+/+</sup> and *p53*<sup>R248W/+</sup> HSPCs (CD150<sup>+</sup>LSKs). n=3 biological replicates. (e) p53 enrichment on *Cebpa* in *p53*<sup>+/+</sup> and *p53*<sup>R248W/+</sup> HSPCs were examined by p53-ChIP assays. n= 3 independent experiments. (f) EZH2 enrichment on *Cebpa* in *p53*<sup>+/+</sup> and *p53*<sup>R248W/+</sup> HSPCs were examined by EZH2-ChIP assays. n= 3 independent experiments. Data are represented as mean ± SEM. p-values were calculated using two-way ANOVA with Dunnett's multiple comparisons test in **a**, paired t-test in **c**, **d**, **e** and **f**; \**P*<0.05, \*\**P*<0.01. Source data are provided as a Source Data file.

## Supplementary Figure 7

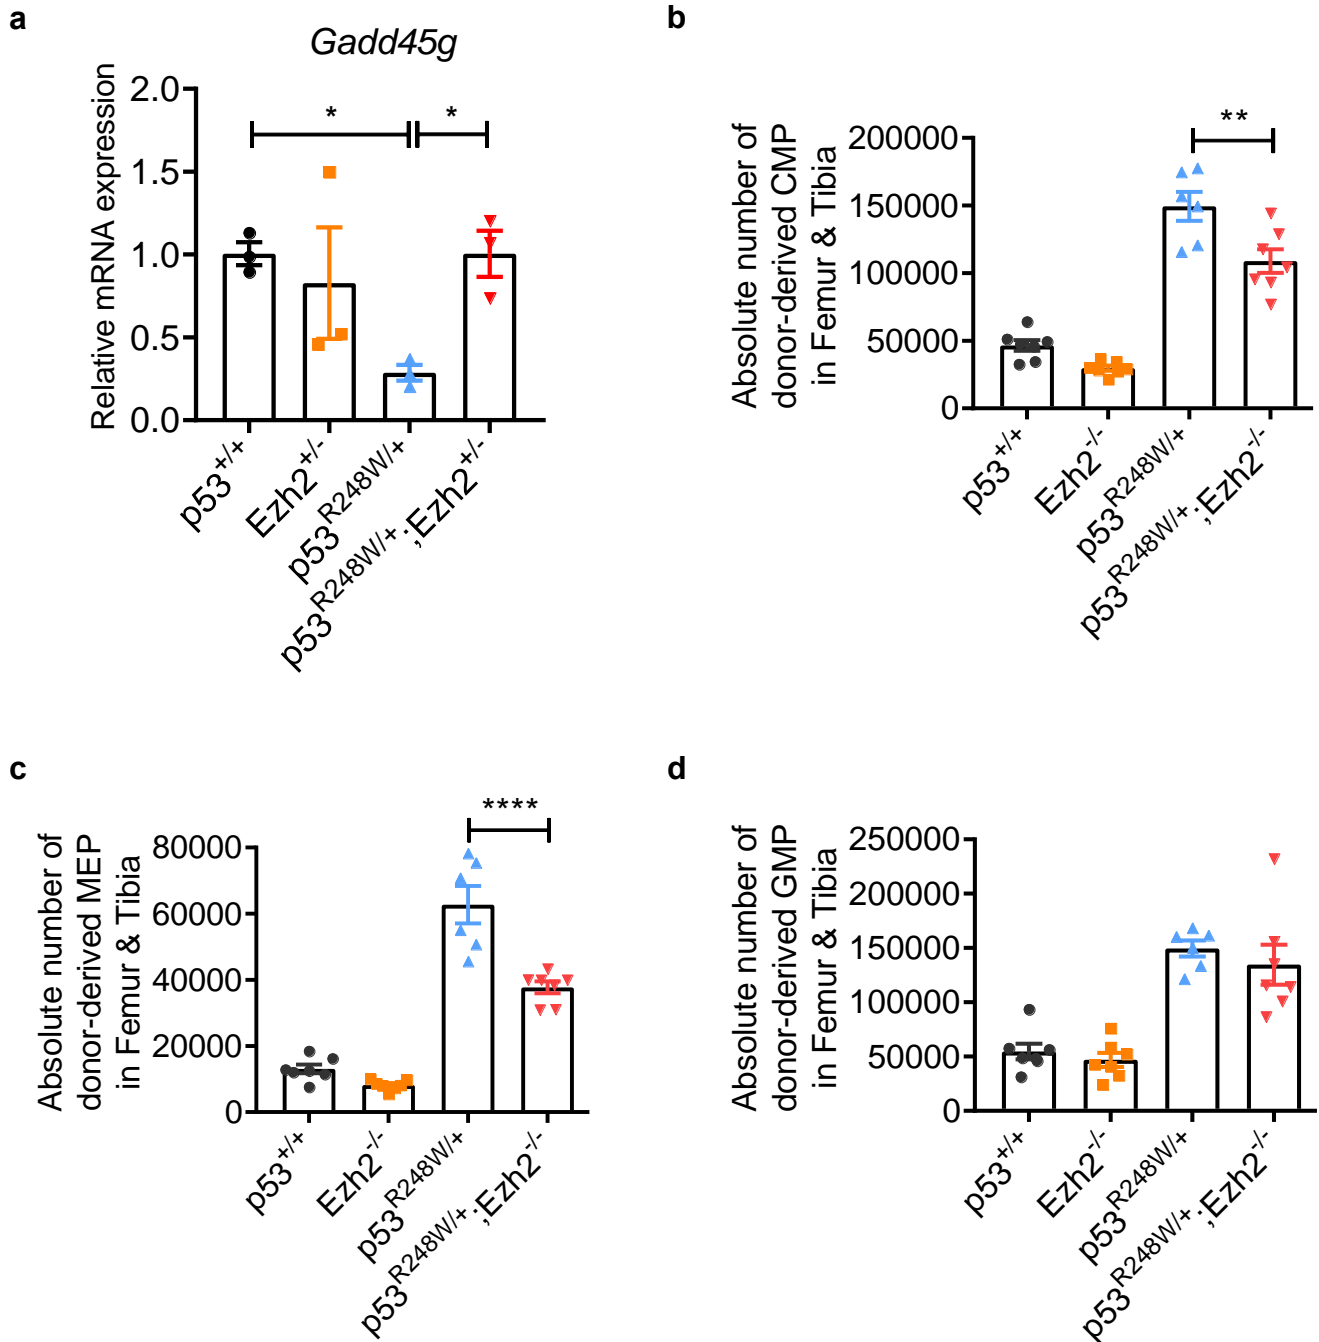

**Supplementary Figure 7. Loss of EZH2 decreases the repopulating potential of p53 mutant HSPCs.** (a) *Gadd45g* expression in  $p53^{+/+}$ ,  $Ezh2^{+/-}$ ,  $p53^{R248W/+}$  and  $p53^{R248W/+};Ezh2^{+/-}$  HSPCs. n=3 biological replicates. (b) The absolute number of donor-derived CMPs in one femur and one tibia of recipient mice 20 weeks following pl:pC treatment. n =6-7 mice per group. (c) The absolute number of donor-derived MEPs in one femur and one tibia of recipient mice 20 weeks following pl:pC treatment. n =6-7 mice per group. (d) The absolute number of donor-derived GMPs in one femur and one tibia of

recipient mice 20 weeks following pl:pC treatment. n =6-7 mice per group. Data are represented as mean  $\pm$  SEM. p-values were calculated using one-way ANOVA with Turkey's multiple comparisons test; \*\* $P$ <0.01, \*\*\* $P$ <0.001, \*\*\*\* $P$ <0.0001. Source data are provided as a Source Data file.

## Supplementary Figure 8

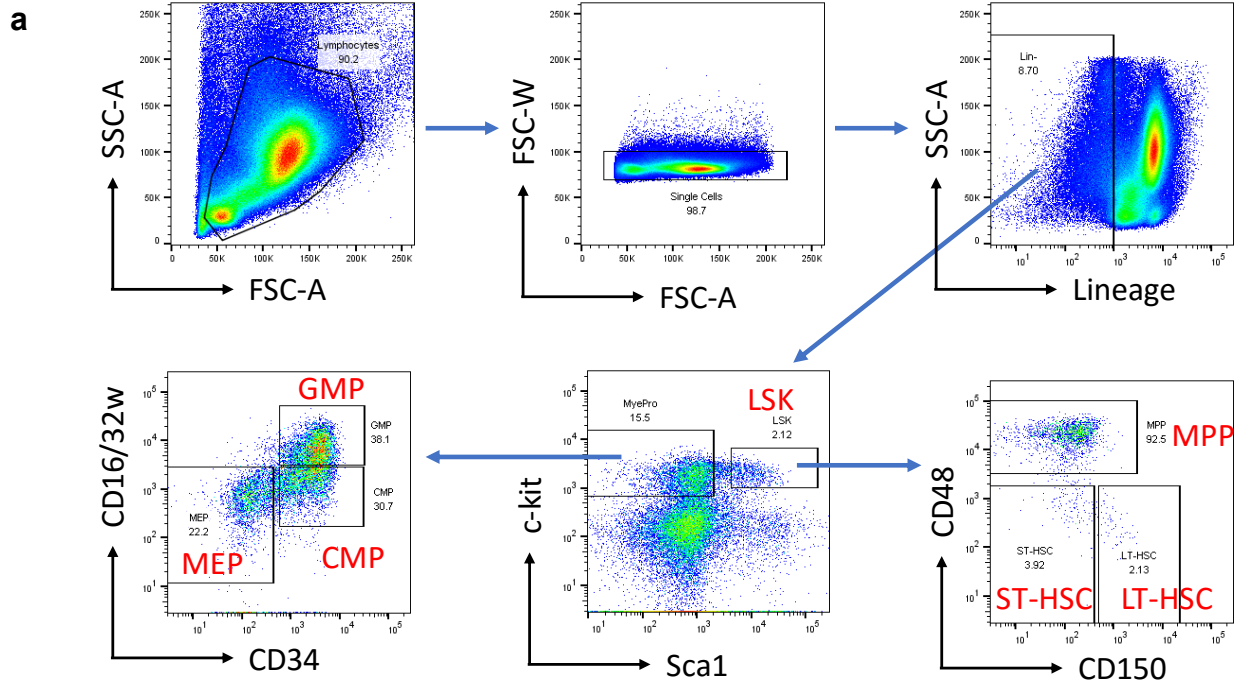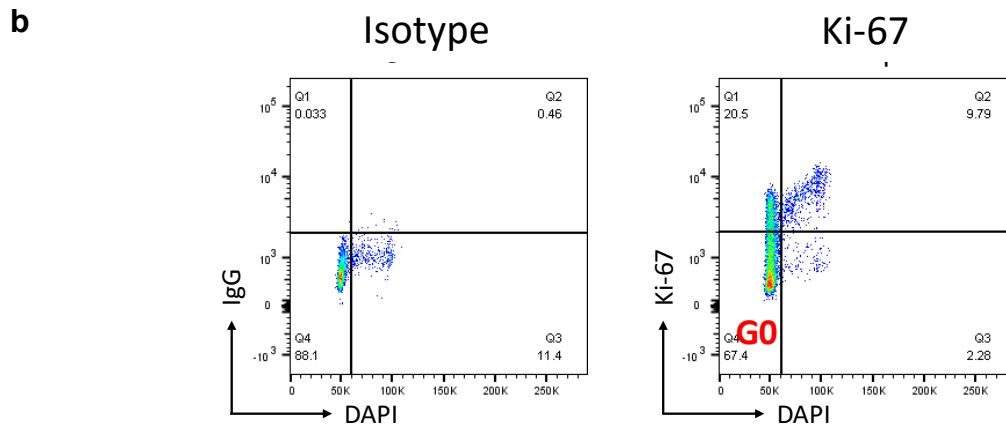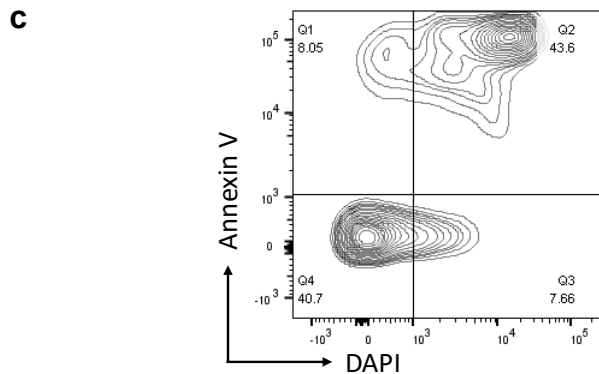

**Supplementary Figure 8. Flow cytometry analysis of HSPCs.** (a) Gating strategy for HSPC flow cytometry analysis. (b) Flow cytometry analysis of ki-67 staining in LSK cells. (c) Flow cytometry analysis of apoptosis by Annexin V and DAPI staining in LSK cells.

**Table 1.** List of antibodies used in the study

| CATALOG #                      | COMPANY                  | ANTIBODY                                      | CLONE     | DILUTION                    |
|--------------------------------|--------------------------|-----------------------------------------------|-----------|-----------------------------|
| <b>FACS antibodies or dyes</b> |                          |                                               |           |                             |
| 109806                         | Biolegend                | FITC anti-mouse CD45.2 Antibody               | 104       | 4x10 <sup>6</sup> cells/1ul |
| 109814                         | Biolegend                | APC anti-mouse CD45.2 Antibody                | 104       | 4x10 <sup>6</sup> cells/1ul |
| 110708                         | Biolegend                | PE anti-mouse CD45.1 Antibody                 | A20       | 4x10 <sup>6</sup> cells/1ul |
| 405208                         | Biolegend                | APC Cy7 Streptavidin                          | -         | 4x10 <sup>6</sup> cells/1ul |
| 115922                         | Biolegend                | PerCP/Cy5.5 anti-mouse CD150 (SLAM) Antibody  | D7        | 4x10 <sup>6</sup> cells/1ul |
| 105812                         | BioLegend                | APC anti-mouse CD117 (c-Kit) Antibody         | 2B8       | 4x10 <sup>6</sup> cells/1ul |
| 105814                         | Biolegend                | PE/Cy7 anti-mouse CD117 (c-Kit) Antibody      | 2B8       | 4x10 <sup>6</sup> cells/1ul |
| 105826                         | Biolegend                | APC Cy7 - anti mouse CD117 Ckit               | 2B8       | 4x10 <sup>6</sup> cells/1ul |
| 12117183                       | eBioscience              | PE-anti mouse CD117                           | 2B8       | 4x10 <sup>6</sup> cells/1ul |
| 103412                         | Biolegend                | APC anti-mouse CD48 Antibody                  | HM48-1    | 4x10 <sup>6</sup> cells/1ul |
| 110721                         | Biolegend                | Pacific Blue™ anti-mouse CD45.1 Antibody      | A20       | 4x10 <sup>6</sup> cells/1ul |
| 11034185                       | eBioscience              | FITC- Anti-mouse CD34                         | RAM34     | 2x10 <sup>6</sup> cells/1ul |
| 101318                         | Biolegend                | PE/Cy7 anti-mouse CD16/32 Antibody            | 93        | 4x10 <sup>6</sup> cells/1ul |
| 108428                         | Biolegend                | PerCP/Cyanine5.5 anti-mouse Ly-6G/Ly-6C (G    | RB6-8C5   | 4x10 <sup>6</sup> cells/1ul |
| 100204                         | BioLegend                | FITC anti-mouse CD3 Antibody [Clone: 17A2]    | 17A2      | 4x10 <sup>6</sup> cells/1ul |
| 100320                         | Biolegend                | PE/Cy7 anti-mouse CD3ε Antibody (100 µg)      | 17A2      | 4x10 <sup>6</sup> cells/1ul |
| 108120                         | Biolegend                | Pacific Blue™ anti-mouse Ly-6A/E (Sca-1) Ant  | D7        | 4x10 <sup>6</sup> cells/1ul |
| 420403                         | Biolegend                | 7-AAD Viability Staining Solution (200 tests) |           | 1:50                        |
| 133307                         | Biolegend                | Biotin anti-mouse/human CD45R/B220            | RA3-6132  | 4x10 <sup>6</sup> cells/1ul |
| 133307                         | Biolegend                | Biotin anti-mouse Lyt-6G/Ly-6C (Gr-1)         | RB6-8C5   | 4x10 <sup>6</sup> cells/1ul |
| 133307                         | Biolegend                | Biotin anti-mouse CD3ε                        | 145-2C11  | 4x10 <sup>6</sup> cells/1ul |
| 133307                         | Biolegend                | Biotin anti-mouse TER-119/ Erythroid cells    | TER-119   | 4x10 <sup>6</sup> cells/1ul |
| 556027                         | Biosciences              | PE Mouse Anti-Ki-67 Set                       | B56       | 2x10 <sup>6</sup> cells/1ul |
| D9542-10MG                     | Sigma                    | DAPI                                          |           | 1ug/ml                      |
| <b>Western Blot antibodies</b> |                          |                                               |           |                             |
| 5246S                          | Cell Signalling          | EZH2                                          | AC22      | 1:1000                      |
| sc-85283                       | Santa Cruz Biotechnology | ASXL1                                         | SC-293204 | 1:200                       |
| C36B11                         | Cell Signaling           | H3K27me3                                      | C36B11    | 1:1000                      |
| ab176115                       | abcom                    | EZH1                                          | AB64850   | 1:1000                      |
| 3737S                          | Cell Signaling           | SUZ12                                         | D39F6     | 1:1000                      |
| 09-774                         | Millipore                | EED                                           |           | 1:1000                      |
| sc-6243                        | Santa Cruz Biotechnology | p53                                           | DO-1      | 1:200                       |
| 2524S                          | Cell Signaling           | p53                                           | 1C12      | 1:200                       |
| 07-448                         | Millipore                | H3K27me1                                      |           | 1:1000                      |
| MA5-15738                      | Thermo Fisher Scientific | Gapdh                                         | GA1R      | 1:5000                      |
| ab1791                         | abcom                    | H3                                            |           | 1:5000                      |
